PART OF A SPECIAL ISSUE ON FUNCTIONAL–DEVELOPMENTAL PLANT CELL BIOLOGY

## Evolution of nectar spur length in a clade of *Linaria* reflects changes in cell division rather than in cell expansion

E. Cullen<sup>1</sup>, M. Fernández-Mazuecos<sup>1,2</sup> and B. J. Glover<sup>1,\*</sup>

<sup>1</sup>Department of Plant Sciences, University of Cambridge, Downing St, Cambridge CB2 3EA, UK and <sup>2</sup>Real Jardín Botánico (RJB-CSIC), Plaza de Murillo 2, Madrid 28014, Spain

\*For correspondence. E-mail [bjg26@cam.ac.uk](mailto:bjg26@cam.ac.uk)

Received: 4 October 2017 Returned for revision: 2 November 2017 Editorial decision: 6 December 2017 Accepted: 8 January 2018  
Published electronically 23 January 2018

• **Background and Aims** Nectar spurs (tubular outgrowths of a floral organ which contain, or give the appearance of containing, nectar) are hypothesized to be a ‘key innovation’ which can lead to rapid speciation within a lineage, because they are involved in pollinator specificity.

Despite the ecological importance of nectar spurs, relatively little is known about their development. We used a comparative approach to investigate variation in nectar spur length in a clade of eight Iberian toadflaxes.

- **Methods** Spur growth was measured at the macroscopic level over time in all eight species, and growth rate and growth duration compared. Evolution of growth rate was reconstructed across the phylogeny. Within the clade we then focused on *Linaria becerrae* and *Linaria clementei*, a pair of sister species which have extremely long and short spurs, respectively. Characterization at a micromorphological level was performed across a range of key developmental stages to determine whether the difference in spur length is due to differential cell expansion or cell division.
- **Key Results** We detected a significant difference in the evolved growth rates, while developmental timing of both the initiation and the end of spur growth remained similar. Cell number is three times higher in the long spurred *L. becerrae* compared with *L. clementei*, whereas cell length is only 1.3 times greater. In addition, overall anisotropy of mature cells is not significantly different between the two species.
- **Conclusions** We found that changes in cell number and therefore in cell division largely explain evolution of spur length. This contrasts with previous studies in *Aquilegia* which have found that variation in nectar spur length is due to directed cell expansion (anisotropy) over variable time frames. Our study adds to knowledge about nectar spur development in a comparative context and indicates that different systems may have evolved nectar spurs using disparate mechanisms.

**Key words:** Anisotropy, cell division, cell expansion, evo-devo, *Linaria becerrae*, *Linaria clementei*, nectar spur

### INTRODUCTION

The ability to vary floral traits has been key to the success and enormous speciation of the flowering plants (angiosperms). One such floral innovation is the nectar spur, a tubular outgrowth of a floral organ (petal or sepal) that contains, or gives the appearance of containing, nectar. Nectar spurs protect nectar from the environment and also enhance pollinator specificity, pollination efficiency and reproductive success (Pacini *et al.*, 2003). Spurs have arisen in a wide variety of taxa, including nasturtium (Tropaeolaceae), *Aquilegia* (Ranunculaceae), many orchids (Orchidaceae) and *Linaria* (Plantaginaceae) (Hodges, 1997). However, there are substantial differences between the systems. In *Aquilegia*, spurs are present on each petal, and the nectary is situated within the spur. In contrast, in *Linaria*, there is only a single spur on the ventral petal, and the gynoecial disc nectary is located above the spur. This study exploits the natural variation of spur length present within the genus *Linaria* to examine the mechanistic basis for interspecific differences in spur length.

A nectar spur restricts nectar collection to specific pollinators with appropriate feeding apparatus, thereby acting to isolate plants reproductively and drive speciation. This has led

to spurs being described as a ‘key innovation’ (Hodges and Arnold, 1995; Hodges, 1997; Box *et al.*, 2008; Bell *et al.*, 2009). Indeed, the study of nectar spurs allows us to make inferences about the mechanisms of speciation and evolution (Bateman and Sexton, 2008; Fernández-Mazuecos and Glover, 2017). Darwin explained the extreme length of the *Angraecum sesquipedale* nectar spur using the ‘coevolutionary race model’, where both the plant and pollinator are under reciprocal selective pressure for longer spurs or longer tongues. In the case of the plant, a longer spur improves the fit of the pollinator body to the flower and therefore the transfer of pollen (reproductive success), whereas in the case of the pollinator a longer tongue improves access to nectar and overall fitness. Conversely, the ‘pollinator shift’ model may also explain nectar spur evolution, where the plant evolves spurs better suited to pollinators that have already adapted to other plants (Whittall and Hodges, 2007). In these cases, nectar spurs can be part of a pollination syndrome – a combination of adaptations shown by a plant to a group of animals, and by that group of animals to the plant. In addition, the study of nectar spurs allows us to address evolutionary developmental (evo-devo) questions spanning the plant and animal kingdoms; for example, the extent and importance of heterochrony (when a change in the timing

of a developmental process occurs). There are two main categories of heterochrony: pedomorphosis, which is where a species appears juvenilized in comparison with an ancestral species, and peramorphosis, where a species matures past adulthood to develop an extended version of a trait (Gould, 1977; Alberch *et al.*, 1979). Extrapolating this logic, shorter spurs could be generated via pedomorphosis, and longer spurs via peramorphosis (Box and Glover, 2010).

The modification of plant form in non-model plant species is currently of great interest. The study of spurs also allows us to examine how organ outgrowth can occur from a planar surface (Monniaux and Hay, 2016). Organ outgrowth in plants requires the interplay of genetic and mechanical forces (Rebocho *et al.*, 2017). First, cell division is required, which is followed by cell expansion (Teale *et al.*, 2006). Once cell division has taken place, plant cells remain fixed in place. It is the cell wall that remains plastic and allows further growth to occur (Cosgrove, 2005; Dupuy *et al.*, 2016). In order for directed cell expansion (anisotropy) to occur, stress occurs in the cell walls, and microtubules direct cellulose synthase enzymes in the direction of cell growth (Braybrook and Jönsson, 2016). Growth hormones such as auxins and cytokinins are involved in cell division and expansion, so it is likely that they are also involved in spur development (Yant *et al.*, 2015).

Studies in species of both *Aquilegia* and *Linaria* have provided some insight into how nectar spurs develop. There is cell division followed by cell elongation in both genera. However, the importance of each phase and whether variation in spur length is achieved by varying cell division or cell elongation is debated. Correlative evidence indicates that cell division is the more important phase in *Linaria vulgaris* and several orchid species (Bateman and Sexton, 2008; Box *et al.*, 2008, 2011). However, research in *Aquilegia* indicates that nectar spur development may be largely due to anisotropic (directional) cell elongation, with more anisotropic growth occurring in longer spurred species (Puzey *et al.*, 2012). Data from Mack and Davies (2015) on *Centranthus ruber* (Red Valerian) also indicate that nectar spur development is due to anisotropy. Given that these are different systems in which nectar

spurs have evolved independently, it is possible that nectar spur development and interspecific variation are driven by different mechanisms in each system.

To analyse the natural variation in spur length among toad-flax species, we examined the Iberian clade of *Linaria* subsect. *Versicolores*, which contains eight species with contrasting spur lengths. We focused at a micromorphological level on *Linaria clementei* and *L. becerrae* (Fig. 1) – sister species which have extremely short and long spurs, respectively – to probe how two species that are so closely related can acquire such dramatically different spur lengths.

## MATERIALS AND METHODS

### Study species

To analyse the natural variation in spur length amongst toad-flax species, we examined the Iberian clade of *Linaria* subsect. *Versicolores*, containing eight species: *Linaria algarviana* Chav., *Linaria becerrae* Blanca, Cueto & J. Fuentes, *Linaria clementei* Haens., *Linaria incarnata* (Vent.) Spreng., *Linaria onubensis* Pau, *Linaria salzmännii* Boiss., *Linaria spartea* (L.) Chaz. and *Linaria viscosa* (L.) Chaz. (Fig. 1A) (Fernández-Mazuecos *et al.*, 2013; Blanca *et al.*, 2017).

There now exist relatively well-resolved phylogenies for the Antirrhineae, including *Linaria* (Oyama and Baum, 2004; Guzmán *et al.*, 2015), and the detailed phylogeny of this particular eight species *Linaria* clade has recently been investigated (Fig. 1B) (Fernández-Mazuecos *et al.*, 2017). This recent phylogenetic analysis used genome-wide DNA sequences generated by genotyping by sequencing, and identified *L. clementei*, with the shortest spur in the group, as sister to *L. becerrae*, with one of the longest spurs. It is also known that the clade diversified very recently, within the Quaternary (Fernández-Mazuecos *et al.*, 2013).

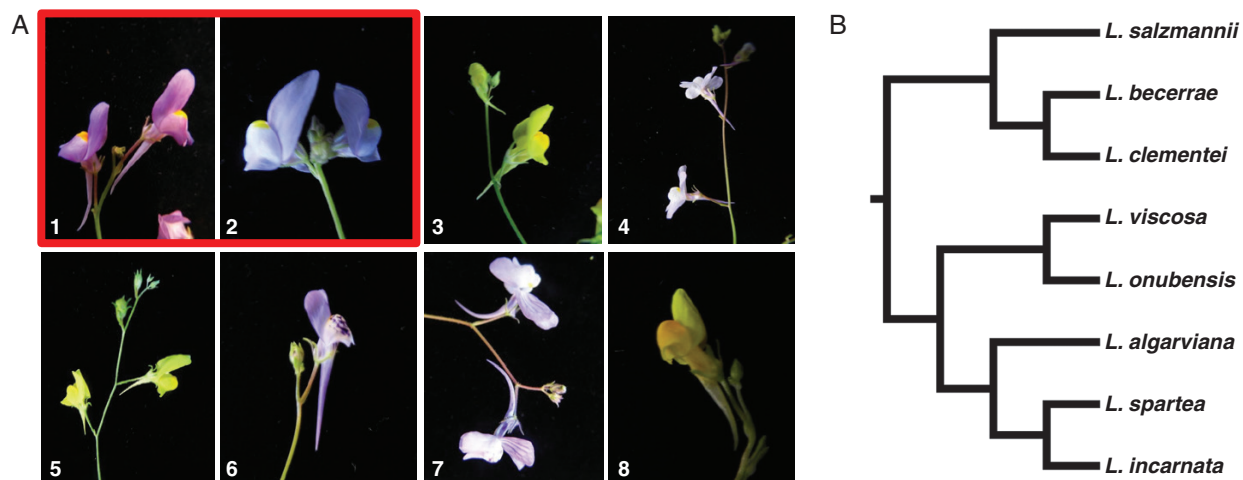

FIG. 1. (A) The eight species of *Linaria* (Iberian clade of *Linaria* subsect. *Versicolores*) examined in this study. The sister species *L. becerrae* and *L. clementei*, which we focus on in this study, are highlighted in red. (1) *L. becerrae*, (2) *L. clementei*, (3) *L. spartea*, (4) *L. onubensis*, (5) *L. viscosa*, (6) *L. algarviana*, (7) *L. incarnata*, (8) *L. salzmännii*. (B) Phylogeny of the clade (Fernández-Mazuecos *et al.*, 2017).

### Plant growth conditions

Plants were grown from seeds collected in wild populations (see [Supplementary Data Table S1](#)). Glasshouse conditions were maintained at 18–25 °C, with 16–18 h daylight, depending on the month when the plants were grown. Plants were grown in Levington’s M3 (UK) compost at the Department of Plant Sciences, or at the Plant Growth Facility at the University of Cambridge, UK.

### Images of spur growth captured over 13 consecutive days

A Dino-Lite digital microscope [Am4000/AD4000 series, AM4113T(R4)] was used to take *in vivo* images of developing spurs for 13 consecutive days. A lateral view of the spur was taken. Five replicates of each species were taken, from two or three biological replicates. Spurs were measured from the calyx–corolla insertion to the tip using ImageJ ([Schindelin et al., 2012](#)), and growth curves were plotted on linear and logarithmic scales.

### Digital microscopy

Appropriate and equivalent developmental stages for *L. becerrae* and *L. clementei* were determined by observing the spur growth curves over 13 days. Five biological replicates from two or three individuals were imaged for each developmental stage ([Table 1](#)). Material was dissected to ensure it was as flat as possible, then mounted on slides covered with double-sided sticky tape. Imaging was performed under standard settings with a digital microscope, VHX-5000 (KEYENCE, America).

### Image analysis

Image analysis was performed in ImageJ ([Schindelin et al. 2012](#)). To examine cell length and width, 30 cells were randomly chosen within the field of view. The 30 replicates were imaged at the base, middle and tip of the spur for each developmental stage and biological replicate (apart from developmental stage one spurs, where only ten replicates were imaged at the base, middle and tip of the spur due to the size of the spur). Overall cell length and width were then calculated from the average base, middle and tip of the spur. Overall anisotropy was calculated as the ratio of overall length to cell width. To count cell number, multiple high-resolution images were taken along

the length of the spur, and then merged in Adobe Photoshop so that cell number could be counted along the length of the spur. A line was drawn along the length of the spur, and all cells dissected by this line were counted using the ‘Cell Counter’ ImageJ plug-in.

### Statistical analysis

To determine whether there were differences in growth rate between the eight species of *Linaria* used to study the natural variation in spur length, a grouped linear regression was used. Given that the growth curves have the appearance of a sigmoidal curve, with an initial slower growth phase, followed by a steep increase in growth that levels off, it was necessary to determine where the steep increase in growth occurred in each species. For this goal, the ‘segmented’ function in R was used to find two breakpoints on averaged data for each species ([Muggeo, 2008; Lemoine, 2012](#)). This approach divided up each species into three segments, and provided a gradient for each slope. The second segment gave the time points for the main growth phase for each species, and these time points were used in the grouped linear regression. Each species was compared with *L. becerrae*. An overall analysis of variance (ANOVA) was used to ascertain that this approach was acceptable, and a significant difference was found ( $P < 0.001$ ).

To determine whether there was a significant difference in initiation or end of the spur growth, the start (when a spur is first observed) and end (when spur length no longer increases) of spur growth was recorded for each of the five individual replicates. Both the start and end of spur growth were compared using the non-parametric Kruskal–Wallis and post-hoc Dunn test.

An ancestral state reconstruction of spur growth rate was conducted based on the phylogeny of [Fernández-Mazuecos et al. \(2017\)](#). We used the coalescent-based species tree topology obtained using the NJ<sub>st</sub> method with branch lengths estimated by maximum likelihood (for details, see [Fernández-Mazuecos et al., 2017](#)). The tree was made ultrametric in Mesquite ([Maddison and Maddison, 2011](#)), and growth rate (averaged over 13 d) was mapped as a continuous character using the maximum likelihood method implemented by the contMap function of the R package phytools ([Revell, 2012](#)).

A non-parametric Kruskal–Wallis test was used to determine the influence of developmental stage on cell length and number in *L. clementei* and *L. becerrae*. This was also used to investigate how location on the spur influenced cell length in *L. becerrae* and *L. clementei* across all developmental stages. A non-parametric Mann–Whitney U-test was used to compare cell number and cell length in the mature spurs of *L. clementei* and *L. becerrae*. The Kruskal–Wallis and Mann–Whitney U-tests were used because the data were not normal and variances were not equal ([Dytham, 2010](#)). All statistical analyses were performed in R version 3.2.2.

## RESULTS

*Evolutionary variation in nectar spur length can largely be attributed to changes in growth rate rather than in developmental time frame*

Spurs of eight closely related *Linaria* species were measured over 13 d to determine whether there were differences in

TABLE 1. Stages used for cell length and number measurements

| Stage | <i>L. becerrae</i> spur length (mm) | <i>L. clementei</i> spur length (mm) | Approximate number of days prior to anthesis |
|-------|-------------------------------------|--------------------------------------|----------------------------------------------|
| 1     | 0.8                                 | 0.2                                  | 4                                            |
| 2     | 3.25                                | 0.5                                  | 2                                            |
| 3     | 6                                   | 0.8                                  | 1                                            |
| 4     | 9                                   | 1.4                                  | 0.5                                          |
| 5     | Open flower                         | Open flower                          | 0                                            |

The stages were selected as they represent five regularly interspaced stages of spur length for *L. becerrae*, and the equivalent stages for *L. clementei* were determined on the growth curves.

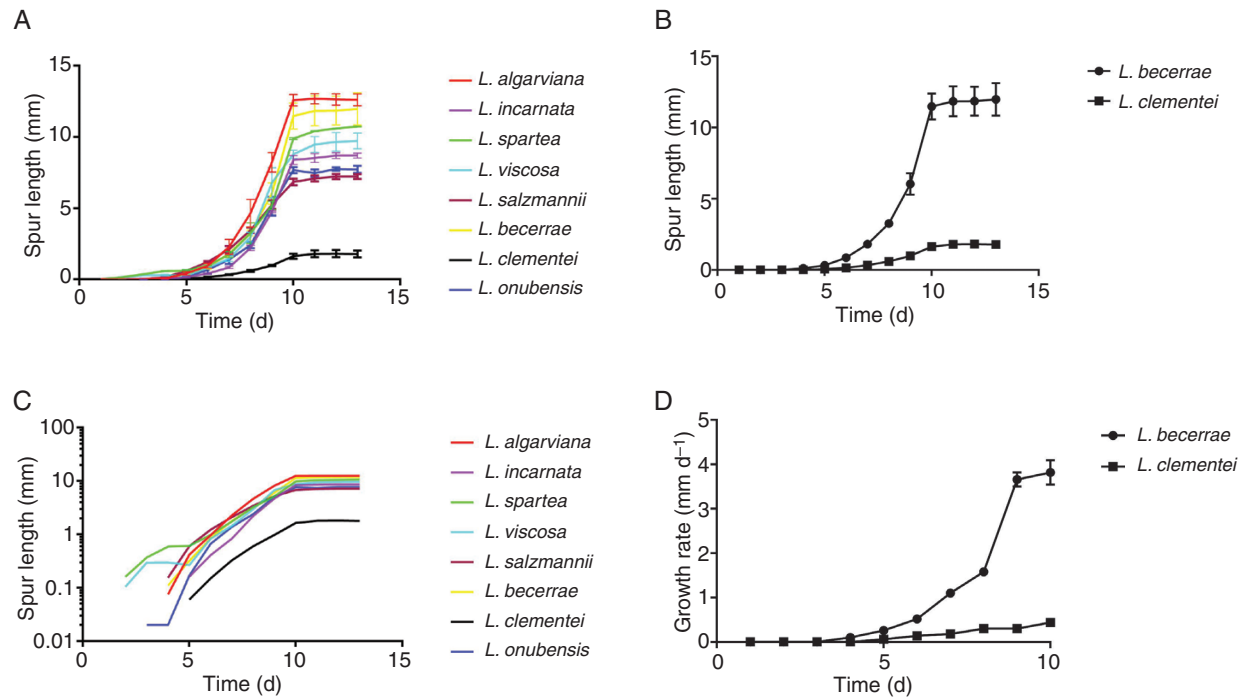

FIG. 2. Spur length measured over 13 d in eight species of *Linaria*. Points represent the mean of five biological replicates. The flower opens at d 10. (A) Spur length over 13 d for eight species of *Linaria*, plotted on a linear scale  $\pm$  s.e. (B) Spur length over 13 d in *L. becerrae* and *L. clementei* only, plotted on a linear scale  $\pm$  s.e. (C) Spur length over 13 d for eight species of *Linaria*, plotted on a logarithmic scale. (D) Growth rate of *L. becerrae* compared with *L. clementei*, calculated as increase in spur length/time per day until the flower opens.

TABLE 2. Results of post-hoc Dunn test when the initiation of spur growth of each individual species was compared with every other individual species studied

| Species         | <i>L. alga.</i> | <i>L. inc.</i> | <i>L. spa.</i> | <i>L. visc.</i> | <i>L. salz.</i> | <i>L. clem.</i> | <i>L. bec.</i> |
|-----------------|-----------------|----------------|----------------|-----------------|-----------------|-----------------|----------------|
| <i>L. inc.</i>  | n.s.            |                |                |                 |                 |                 |                |
| <i>L. spa.</i>  | *               | ***            |                |                 |                 |                 |                |
| <i>L. visc.</i> | n.s.            | *              | n.s.           |                 |                 |                 |                |
| <i>L. salz.</i> | n.s.            | *              | *              | n.s.            |                 |                 |                |
| <i>L. clem.</i> | *               | n.s.           | ***            | **              | *               |                 |                |
| <i>L. bec.</i>  | n.s.            | *              | *              | n.s.            | n.s.            | *               |                |
| <i>L. onu.</i>  | n.s.            | n.s.           | **             | n.s.            | n.s.            | n.s.            | n.s.           |

*L. alga.*, *L. algarviana*; *L. onu.*, *L. onubensis*; *L. spa.*, *L. sparteae*; *L. visc.*, *L. viscosa*; *L. salz.*, *L. salzmännii*; *L. clem.*, *L. clementei*; *L. bec.*, *L. becerrae*; *L. onu.*, *L. onubensis*.

n.s., non-significant; \* $P < 0.05$ ; \*\* $P < 0.01$ ; \*\*\* $P < 0.001$ .

growth (Fig. 2). We hypothesized that longer spurred species may start growth earlier than shorter spurred species. There is a significant difference in initiation ( $\chi^2 = 20.79$ ; d.f. 7;  $P < 0.001$ ) and end of spur growth ( $\chi^2 = 25.1$ ; d.f. 7;  $P < 0.001$ ) among the eight species (see Tables 2 and 3). However, a post-hoc Dunn test revealed that although there are discrepancies, there is no significant difference in spur growth initiation or termination between the longest spurred species, *L. algarviana*, and the species with the shortest spur, *L. clementei* ( $P > 0.05$ ). When comparing the sister species *L. becerrae* and *L. clementei*, there was a significant difference in timing of spur initiation ( $P < 0.05$ ); however, there was no difference in when termination of spur growth occurred ( $P > 0.05$ ).

To test whether the growth rate within the growth period determined by the segmented function was different between species (Table 4), we used a grouped linear regression comparing species with *L. becerrae*. It determined that *L. clementei* ( $P < 0.001$ ), *L. onubensis* ( $P < 0.01$ ) and *L. salzmännii* ( $P < 0.001$ ) had a significantly different growth rate from *L. becerrae* (the other five species were not significantly different). There was in addition a significant interaction between species and time ( $P < 0.001$ ). As expected, there was also a significant difference between time and spur length ( $P < 0.001$ ). An overall ANOVA confirmed the above results.

To determine the direction of evolutionary change across the clade, particularly between *L. becerrae* and *L. clementei*, evolution of spur growth rate (averaged over 13 d) was reconstructed and plotted on the phylogeny (Fig. 3). The maximum likelihood value for the rate of the common ancestor of *L. becerrae* and *L. clementei* was intermediate between the rates of both species. Although error intervals were broad, there was a well-supported decrease in growth rate in *L. clementei* from that ancestor.

*Greater cell division, rather than cell expansion, explains the difference in spur length between L. clementei and L. becerrae*

To determine whether differences in cell elongation or cell division are responsible for contrasting spur lengths, cell number, length and width were measured in nectar spur epidermal cells of both *L. becerrae* and *L. clementei* at five different developmental stages (Fig. 4A, B). Cell number was

TABLE 3. Results of post-hoc Dunn test when the end of spur growth of each individual species was compared with every other individual species studied

| Species         | <i>L. alga.</i> | <i>L. inc.</i> | <i>L. spa.</i> | <i>L. visc.</i> | <i>L. salz.</i> | <i>L. clem.</i> | <i>L. bec.</i> |
|-----------------|-----------------|----------------|----------------|-----------------|-----------------|-----------------|----------------|
| <i>L. inc.</i>  | n.s.            |                |                |                 |                 |                 |                |
| <i>L. spa.</i>  | *               | n.s.           |                |                 |                 |                 |                |
| <i>L. visc.</i> | *               | n.s.           | n.s.           |                 |                 |                 |                |
| <i>L. salz.</i> | *               | n.s.           | n.s.           | n.s.            |                 |                 |                |
| <i>L. clem.</i> | n.s.            | n.s.           | *              | *               | *               |                 |                |
| <i>L. bec.</i>  | n.s.            | n.s.           | **             | **              | **              | n.s.            |                |
| <i>L. onu.</i>  | n.s.            | *              | ***            | **              | ***             | n.s.            | n.s.           |

*L. alga.*, *L. algarviana*; *L. onu.*, *L. onubensis*; *L. spa.*, *L. spartea*; *L. visc.*, *L. viscosa*; *L. salz.*, *L. salzmannii*; *L. clem.*, *L. clementei*; *L. bec.*, *L. becerrae*; *L. onu.*, *L. onubensis*.

n.s., non-significant; \* $P < 0.05$ ; \*\* $P < 0.01$ , \*\*\* $P < 0.001$ .

TABLE 4. Dates of average initiation and end of spur growth (over 13 d) based on five replicates

| Species              | Average initiation of spur (d) | Average end of spur growth (d) | Day segmented function identified | Average growth rate over 13 d ( $\text{mm d}^{-1}$ ) |
|----------------------|--------------------------------|--------------------------------|-----------------------------------|------------------------------------------------------|
| <i>L. clementei</i>  | 5.4                            | 10.8                           | 7–10                              | 0.1                                                  |
| <i>L. becerrae</i>   | 4.4                            | 10.4                           | 8–10                              | 0.9                                                  |
| <i>L. onubensis</i>  | 4.6                            | 10.2                           | 7–10                              | 0.6                                                  |
| <i>L. salzmannii</i> | 4.4                            | 12.2                           | 6–10                              | 0.6                                                  |
| <i>L. spartea</i>    | 2.2                            | 12.2                           | 8–10                              | 0.8                                                  |
| <i>L. viscosa</i>    | 3.4                            | 12                             | 8–10                              | 0.7                                                  |
| <i>L. algarviana</i> | 4.6                            | 10.8                           | 7–10                              | 0.9                                                  |
| <i>L. incarnata</i>  | 5.4                            | 11.4                           | 8–10                              | 0.7                                                  |

The days that the segmented function identified as steep increases in growth rate predicted by the segmented package (which was used for the grouped linear regression) and the average growth rate (calculated as increase in spur length per day) over 13 d is shown.

found to differ strikingly between the two species (Fig. 4C). Cell number in the *L. becerrae* spur shows a large increase from approx. 60 in stage two to approx. 230 in stage three (representing approximately two rounds of cell division). However, there is little difference in cell length between stages one and two (Fig. 4D). Thus, most cell expansion takes place between stage two and the mature spur. Although cell expansion follows the same trend in *L. clementei*, cell number increases more slowly, from 35 at stage two to 40 at stage three; moreover, it increases throughout development, unlike in *L. becerrae*. There is a highly significant difference in cell number in the mature spur at the species level ( $W = 73$ ;  $P < 0.001$ ) and at the level of developmental stage ( $\chi^2 = 21.99$ ; d.f. 4;  $P < 0.001$ ) (Fig. 4C, D).

The average overall length of a cell at the base of the mature nectar spur of *L. clementei* was 50  $\mu\text{m}$ , and in *L. becerrae* it was 70  $\mu\text{m}$ . These lengths reflected a fairly steady growth rate in both species, from 14  $\mu\text{m}$  in *L. clementei* at stage one and 21  $\mu\text{m}$  in *L. becerrae* at stage one, with the maximum increase in length occurring between stage four and five for both *L. clementei* and *L. becerrae*. Cell length in the mature spur was found to be significantly different between the species ( $W = 2949$ ;  $P < 0.001$ ) and highly significantly different at contrasting developmental stages ( $\chi^2 = 658.95$ ; d.f. 4;  $P < 0.001$ ) (Fig. 4D).

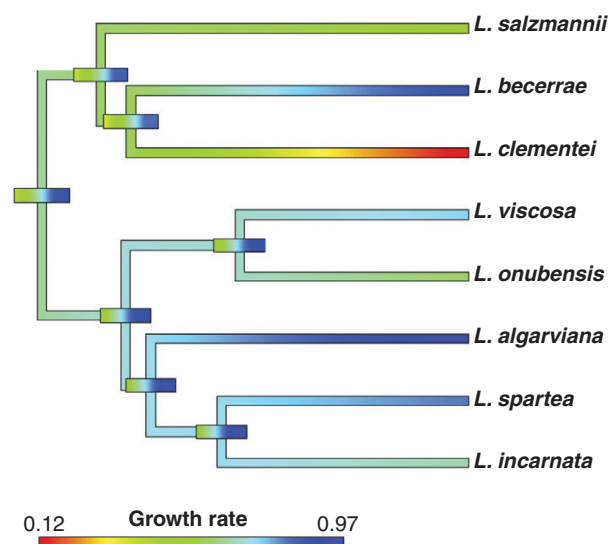

FIG. 3. Evolution of spur growth rate (averaged over 13 d) plotted onto the phylogeny of the clade. The maximum likelihood reconstruction is represented as gradational colours along the branches; bars at nodes represent uncertainty (error range).

Anisotropy does not explain the difference in spur length between *L. clementei* and *L. becerrae*

In both species there is a trend of cell length and cell width decreasing from the base to the tip of the spur (Fig. 5). This differs from cells in *Aquilegia* which become larger towards the tip of the spur (see Supplementary Data Fig. S1). Cell length increases steadily in *L. clementei* at the base, middle and tip of the spur (Fig. 5B). Cell length in *L. becerrae* shows a different trend; cell length decreasing at the base and middle of the spur from stage one to two indicates that cell division is taking place (Fig. 5A). Cell length steadily increases until stage four, and there is then a large increase in cell length from stage four to five. Examination of cell width data in *L. clementei* reveals that mean cell width remains at approx. 14  $\mu\text{m}$  across the base, middle and tip of the spur from stage one to stage four (perhaps as the epidermal cells of *L. clementei* divide through most of the developmental period), and then expansion of cell width occurs from stage four to stage five (Fig. 5D). *Linaria becerrae* shows a decrease in cell width at the base and middle of the spur, from stage one to stage two, which is again indicative of cell division. Steady growth then occurs across the base, middle and tip of the spur; a large increase in cell width occurs at stage five, which is more marked at the base of the spur (Fig. 5C). There was no significant difference between cell length and location on the spur (base, middle or tip of the spur) in *L. becerrae* ( $\chi^2 = 3.11$ ; d.f. 2;  $P < 0.05$ ), in contrast to *L. clementei* ( $\chi^2 = 236$ ; d.f. 2;  $P < 0.001$ ).

Overall cell anisotropy (measured at the base, middle and tip of the spur) at the five different developmental stages was calculated (Fig. 6). Cells with equal length and width have an anisotropic value of 1, and therefore even at stage one both *L. becerrae* and *L. clementei* have longitudinally elongated epidermal cells, although the cells of *L. becerrae* are more elongated with an anisotropic value of 2, compared with *L. clementei* which has an anisotropic value of 1.5. The cells of *L. becerrae* maintain the anisotropic value of approx. 2 until

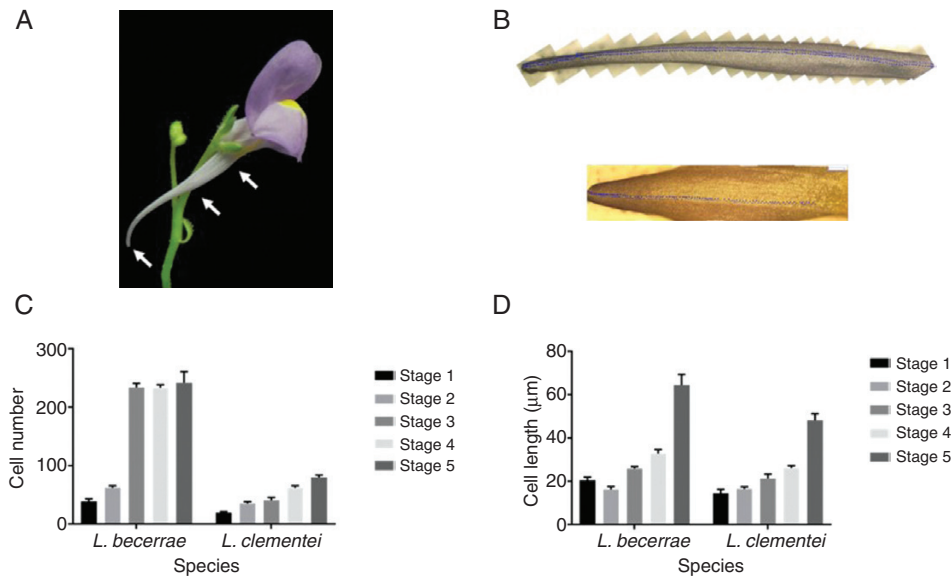

FIG. 4. Micromorphological analysis of the spur. (A) Where the measurements at the base, middle and tip of the spur took place, illustrated with *L. becerrae*. (B) An example of a merged spur of *L. becerrae* at the top (spur length of approx. 12 mm), and a merged spur of *L. clementei* at the bottom (spur length of approx. 2 mm). The cells counted along the length of the spur are shown in blue. (C, D) A comparison of nectar spur cell number and cell length in *L. becerrae* and *L. clementei* is shown at five progressive developmental stages (Table 1); mean  $\pm$  s.e. is shown. Five biological replicates were taken. (C) Cell number in *L. becerrae* and *L. clementei*. (D) Overall cell length in *L. becerrae* and *L. clementei* (averaged data from the base, middle and tip of the spur). The data shown are the mean of 30 cell replicates at the base, middle and tip of the spur for five biological samples (apart from developmental stage one spurs, where only ten replicates were imaged at the base, middle and tip of the spur due to the small size of the spur).

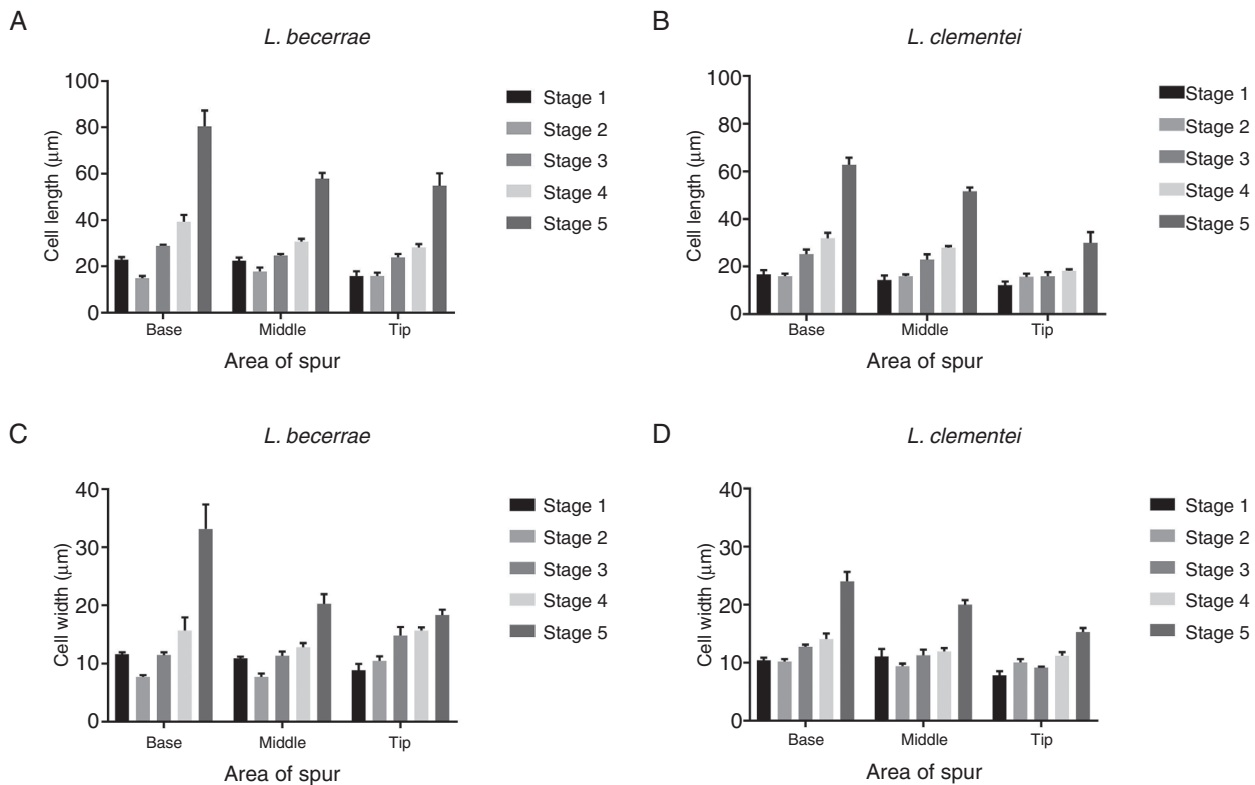

FIG. 5. Cell length and width at five progressive developmental stages at the base, middle and tip of the spur in *L. becerrae* and *L. clementei*. Data shown are the mean of 30 replicates for each biological replicate, with five biological replicates  $\pm$  s.e. (A) Cell length along the spur of *L. becerrae*. (B) Cell length along the spur of *L. clementei*. (C) Cell width along the spur of *L. becerrae*. (D) Cell width along the spur of *L. clementei*.

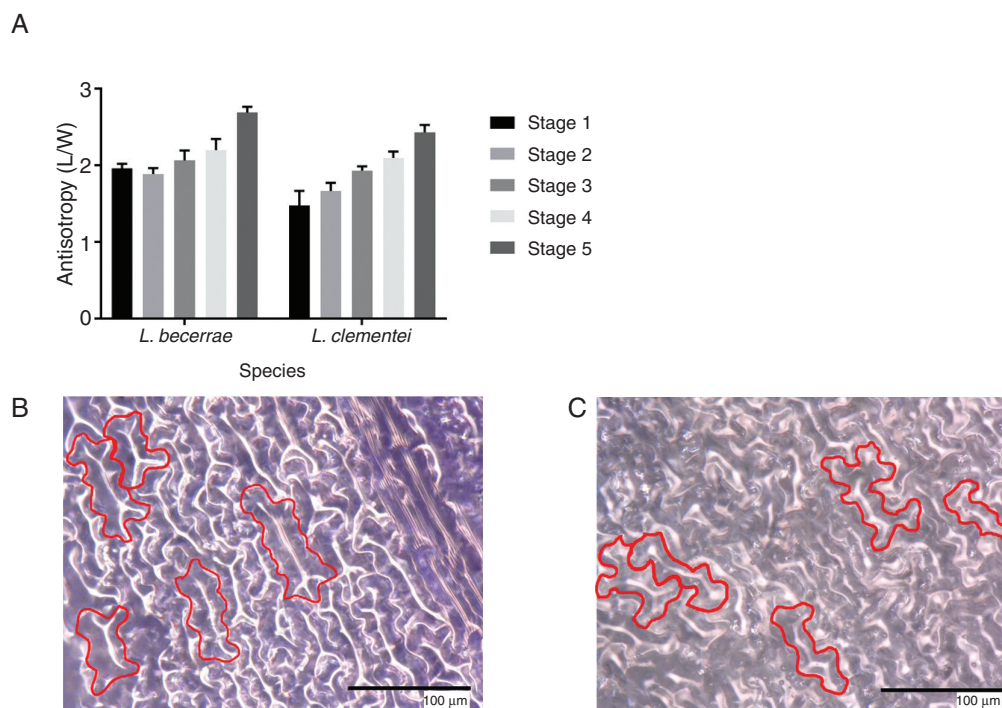

FIG. 6. Overall cell anisotropy within the spur is similar in both *L. becerrae* and *L. clementei*. (A) Cell anisotropy within the spur of both *L. becerrae* and *L. clementei* was calculated by examining the ratio of cell length to cell width vs. overall cell length and cell width in the mature spur. (B, C) Images of epidermal cells at the base of *L. becerrae* and *L. clementei* spurs. Five epidermal cells are outlined in red in each image as an example of cell boundaries. (B) *L. becerrae* spur. (C) *L. clementei* spur.

stage four and five, when directed cell expansion begins to take place. This contrasts with the data from *L. clementei*, where a slow and steady increase in anisotropy occurs throughout the five developmental stages. Anisotropy in the mature cells was not significantly different between *L. becerrae* and *L. clementei* ( $W = 3$ ,  $P > 0.05$ ). Therefore, anisotropy cannot explain the differences in spur length between the two species. The overall cell length of mature spurs of *L. becerrae* is 1.3 times the length of cells in *L. clementei*. Conversely, cell number is three times higher in *L. becerrae* compared with *L. clementei*.

## DISCUSSION

*The developmental time frame of spur growth in Linaria does not vary with spur length*

We hypothesized that the longer spurred *Linaria* species examined by us would have a longer developmental time frame. However, we found that although there were some differences in timing of initiation and end of spur growth, the difference was not between the longest- and shortest-spurred species; rather, it was between species with intermediate sized spurs. Although there was a difference in spur initiation time for *L. becerrae* and *L. clementei*, termination of spur growth was not significantly different. In general, it is evident that both initiation and conclusion of spur growth are loosely synchronized among the clade of *Linaria* species that we studied, including the two sister species *L. becerrae* and *L. clementei*, and that differences in spur length across species are mainly the result of changes in spur growth rate. This outcome contrasts with data from *Aquilegia*.

*Puzey et al. (2012)* compared the growth period of four different *Aquilegia* species and found that growth duration differed between the shortest- and longest-spurred species, spur development in the longest spurred species taking 6 d longer than in the shorter spurred species. This observation may indicate that *Aquilegia* and *Linaria* spur growth is fundamentally different. Although the *Linaria* data presented here show eight closely related species of varying spur length in the same clade, mainly pollinated by bees, the *Aquilegia* data show four species that were chosen to represent different pollination syndromes; for example, *Aquilegia vulgaris* is bee pollinated but *A. longissima* is hawkmoth pollinated. It would therefore be interesting to investigate the duration of growth in other clades of *Linaria* and other spurred genera within the tribe Antirrhineae (e.g. *Kickxia*, *Chaenorhinum*, *Cymbalaria*), to determine whether the same trend is conserved across the tribe.

*Cell number is a major factor in evolution of Linaria spur length*

Spur development can only consist of cell division and/or anisotropic cell elongation (Box et al., 2011). Detected interspecific differences in spur growth rate generating length variation could be due to: (1) variation in initial cell divisions and cell number (resulting in faster or slower growth at the same rate of cell elongation); (2) variation in the rate of anisotropic elongation and in final cell size (resulting in faster or slower growth from the same number of cells); or (3) a combination of both. At a micromorphological scale, we observed that although cell length was significantly different between the mature spurs of *L. becerrae* and *L. clementei*, overall cell anisotropy was not

significantly different. In addition, there were three times more cells in *L. becerrae* compared with *L. clementei*, whereas cell length was only 1.3 times the length of cells in *L. clementei*. Therefore, the major evolutionary change explaining the difference in spur growth rate and length between these species (c. 7 times longer in *L. becerrae* than in *L. clementei*) appears to be the decreased cell number (and therefore decreased cell division) in *L. clementei* in comparison with *L. becerrae*. This contrasts with observations on *Aquilegia*, in which cell number was only found to vary by  $30 \pm 21\%$  between the longest and shortest spurs. [Puzey et al. \(2012\)](#) found that increases in *Aquilegia* spur length were largely due to anisotropic cell expansion, which increases from the base to the tip of the spur. [Mack and Davis \(2015\)](#) also concluded that anisotropy was largely responsible for spur outgrowth in *Centranthus ruber*, but argued that anisotropic growth occurred equally across the spur. It should be noted that in this study we only measured and counted epidermal cells, and therefore cannot exclude the possibility that the sub-epidermal cell layers behave differently. Overall, nectar spur outgrowth is a good system for investigating novel organ outgrowth, and the use of modelling may help to give even greater insight into the initial outgrowth of the spur in *Linaria* ([Coen and Rebocho, 2016](#); [Rebocho et al., 2017](#)).

#### *Mechanisms of nectar spur growth may vary in different plant systems*

It is important to note that, in addition to the obvious phylogenetic differences, there are differences between the various systems in which nectar spur growth has been studied. *Centranthus* and *Linaria* both possess a single spur per flower and, while a trichomatous nectary within the spur is responsible for nectar secretion in *C. ruber*, in *Linaria* the nectary is situated above a single spur. In *Aquilegia* species, which possess five spurs per pentamerous flower, the nectary is situated within the spur, which may act as an organizer during spur initiation. Therefore, differences such as cell length in *Aquilegia* increasing from the base of the spur to the tip of the spur, while decreasing in *Linaria* from the base to the tip of the spur, may not be surprising.

Heterochrony can help to explain the variation in spur length in different systems. Our reconstruction of the evolution of growth rate indicates that the common ancestor of *L. becerrae* and *L. clementei* was probably intermediate in growth rate, although we note that this is a statistical output based on the traits of the sister species, and that the rest of the clade contains species with long spurs. In any case, it is most likely that a decrease in growth rate occurred in the *L. clementei* lineage relative to its ancestor. Therefore, the shorter spur of *L. clementei* can be explained by neoteny, a category of paedomorphosis when there is no change in the timing of maturity but rather a decrease in the amount of development undergone before maturity is reached ([Gould, 1977](#); [Box and Glover, 2010](#)). The data presented here indicate that neoteny in *L. clementei* is caused by a decrease in cell division, rather than a decrease in cell expansion. The molecular mechanisms behind both the outgrowth and variation in length of the spur are intriguing; they too may differ between the *Aquilegia* and *Linaria* systems (cf. [Box et al., 2011](#); [Yant et al., 2015](#)).

#### Conclusions

This study used a comparative evo-devo approach to investigate nectar spur development at the micro and macro scale, aiming to discover how nectar spur development evolves in terms of tissue dynamics. We compared two sister species with dramatically different spur lengths to discover the basis of the variation in spur length. Our data indicate that spur length in *Linaria* is dependent on the number of cells, derived from initial cell divisions, which elongate at the same rate, resulting in different rates of spur elongation. Variation in cell division supports the idea that changes in the activity of cell cycle genes and their regulators may be involved in nectar spur evolution.

#### SUPPLEMENTARY DATA

Supplementary data are available online at <https://academic.oup.com/aob> and consist of the following. Figure S1: images along the spur of *L. clementei* showing larger cells at the base of the spur compared with the middle and tip. Table S1: localities where seeds were collected.

#### ACKNOWLEDGEMENTS

We thank Matthew Dorling for excellent plant care, all members of the Glover Lab and Richard Bateman for interesting discussions around the data, and Levi Yant and an anonymous reviewer for helpful comments on the manuscript. We thank the Cambridge BBSRC DTP for funding for E.V.C., and the EU Marie Curie Actions programme (*LINARIA-SPECIATION* project, FP7-PEOPLE-2013-IEF, reference 624396) and the Isaac Newton Trust for providing funding to M.F.M.

#### LITERATURE CITED

- Alberch P, Gould S, Oster G, Wake D. 1979.** Size and shape in ontogeny and phylogeny. *Paleobiology* **5**: 296–317.
- Bateman RM, Sexton R. 2008.** Is spur length of *Platanthera* species in the British Isles adaptively optimized or an evolutionary red herring? *Watsonia* **21**: 1–21.
- Bell AK, Roberts DL, Hawkins JA, Rudall PJ, Box MS, Bateman RM. 2009.** Comparative micromorphology of nectariferous and nectarless labellar spurs in selected clades of subtribe Orchidinae (Orchidaceae). *Botanical Journal of the Linnean Society* **160**: 369–387.
- Blanca G, Cueto M, Fuentes J. 2017.** *Linaria becerrae* (Plantaginaceae), a new endemic species from the southern Spain, and remarks on what *Linaria salzmännii* is and is not. *Phytotaxa* **298**: 261.
- Box MS, Glover BJ. 2010.** A plant developmentalist's guide to paedomorphosis: reintroducing a classic concept to a new generation. *Trends in Plant Science* **15**: 241–246.
- Box MS, Bateman RM, Glover BJ, Rudall PJ. 2008.** Floral ontogenetic evidence of repeated speciation via paedomorphosis in subtribe Orchidinae (Orchidaceae). *Botanical Journal of the Linnean Society* **157**: 429–454.
- Box MS, Dodsworth S, Rudall PJ, Bateman RM, Glover BJ. 2011.** Characterization of *Linaria* *KNOX* genes suggests a role in petal-spur development. *The Plant Journal* **68**: 703–714.
- Braybrook SA, Jönsson H. 2016.** Shifting foundations: the mechanical cell wall and development. *Current Opinion in Plant Biology* **29**: 115–120.
- Coen E, Rebocho AB. 2016.** Resolving conflicts: modeling genetic control of plant morphogenesis. *Developmental Cell* **38**: 579–583.
- Cosgrove DJ. 2005.** Growth of the plant cell wall. *Nature Reviews. Molecular Cell Biology* **6**: 850–861.



- Dupuy L, Mackenzie J, Haseloff J, *et al.* 2016. Coordination of plant cell division and expansion in a simple morphogenetic system. *107*: 2711–2716.
- Dytham C. 2010. *Choosing and using statistics: a biologist's guide*, 3rd edn. Chichester, UK: Wiley.
- Fernández-Mazuecos M, Glover BJ. 2017. The evo-devo of plant speciation. *Nature Ecology & Evolution* 1: 110.
- Fernández-Mazuecos M, Blanco-Pastor JL, Gómez JM, Vargas P. 2013. Corolla morphology influences diversification rates in bifid toadflaxes (*Linaria* sect. *Versicolores*). *Annals of Botany* 112: 1705–1722.
- Fernández-Mazuecos M, Mellers G, Vigalondo B, Sáez L, Vargas P, Glover BJ. 2017. Resolving recent plant radiations: power and robustness of genotyping-by-sequencing. *Systematic Biology*, doi:10.1093/sysbio/syx062 (in press).
- Gould S. 1977. *Ontogeny and phylogeny*. Cambridge, MA: Harvard University Press.
- Guzmán B, Gómez JM, Vargas P. 2015. Bees and evolution of occluded corollas in snapdragons and relatives (Antirrhineae). *Perspectives in Plant Ecology, Evolution and Systematics* 17: 467–475.
- Hodges SA. 1997. Floral nectar spurs and diversification. *International Journal of Plant Sciences* 158: S81–S88.
- Hodges SA, Arnold ML. 1995. Spurring plant diversification: are floral nectar spurs a key innovation? *Proceedings of the Royal Society B: Biological Sciences* 262: 343–348.
- Lemoine N. 2012. *R for ecologists: putting together a piecewise regression | R-bloggers*. <https://www.r-bloggers.com/r-for-ecologists-putting-together-a-piecewise-regression/>.
- Mack JL, Davis AR. 2015. The relationship between cell division and elongation during development of the nectar-yielding petal spur in *Centranthus ruber* (Valerianaceae). *Annals of Botany* 115: 641–649.
- Maddison WP, Maddison DR. 2011. *Mesquite: a modular system for evolutionary analysis*. Available at <http://mesquiteproject.org>.
- Monniaux M, Hay A. 2016. Cells, walls, and endless forms. *Current Opinion in Plant Biology* 34: 114–121.
- Muggeo VMR. 2008. *Segmented: an R package to fit regression models with broken-line relationships*. [https://www.google.co.uk/search?q=Muggeo%2C+V.M.R.+\(2008\)+Segmented%3A+an+R+package+to+fit+regression+models+with+broken-line+relationships.+R+News+8%2F1%2C+20-25&ie=utf-8&oe=utf-8&client=firefox-b-ab&gfe\\_rd=cr&ei=L65rWNRTOlrCaLzvtxg](https://www.google.co.uk/search?q=Muggeo%2C+V.M.R.+(2008)+Segmented%3A+an+R+package+to+fit+regression+models+with+broken-line+relationships.+R+News+8%2F1%2C+20-25&ie=utf-8&oe=utf-8&client=firefox-b-ab&gfe_rd=cr&ei=L65rWNRTOlrCaLzvtxg).
- Oyama RK, Baum DA. 2004. Phylogenetic relationships of North American *Antirrhinum* (Veronicaceae). *American Journal of Botany* 91: 918–925.
- Pacini E, Nepi M, Vesprini JL. 2003. Nectar biodiversity: a short review. *Plant Systematics and Evolution* 238: 7–21.
- Puzey JR, Gerbode SJ, Hodges SA, Kramer EM, Mahadevan L. 2012. Evolution of spur-length diversity in *Aquilegia* petals is achieved solely through cell-shape anisotropy. *Proceedings of the Royal Society B: Biological Sciences* 279: 1640–1645.
- Rebocho AB, Southam P, Kennaway JR, Bangham JA, Coen E. 2017. Generation of shape complexity through tissue conflict resolution. *eLife* 6: e20156.
- Revell LJ. 2012. phytools: an R package for phylogenetic comparative biology (and other things). *Methods in Ecology and Evolution* 3: 217–223.
- Schindelin J, Arganda-Carreras I, Frise E, *et al.* 2012. Fiji: an open-source platform for biological-image analysis. *Nature Methods* 9: 676–682.
- Teale WD, Paponov IA, Palme K. 2006. Auxin in action: signalling, transport and the control of plant growth and development. *Nature Reviews. Molecular Cell Biology* 7: 847–859.
- Whittall JB, Hodges SA. 2007. Pollinator shifts drive increasingly long nectar spurs in columbine flowers. *Nature* 447: 706–709.
- Yant L, Collani S, Puzey J, Levy C, Kramer EM. 2015. Molecular basis for three-dimensional elaboration of the *Aquilegia* petal spur. *Proceedings of the Royal Society B: Biological Sciences* 282: 20142778.
